# Supplementary material
Source: publisher figshare collection journal article supplement (https://frontiersin.figshare.com/ndownloader/files/28610022)
Supplement: Supplementary file [file 28610022]

|    | UniqueP<br>epCount | Swiss-Prot<br>accession<br>number | gene     | protein                                                                |
|----|--------------------|-----------------------------------|----------|------------------------------------------------------------------------|
| 1  | 30                 | P21333                            | FLNA     | filamin A, alpha                                                       |
| 2  | 20                 | O14744                            | PRMT5    | Protein arginine N-methyltransferase 5                                 |
| 3  | 17                 | Q9Y2W1                            | THRAP3   | Thyroid hormone receptor-associated protein 3                          |
| 4  | 14                 | Q9BQA1                            | WDR77    | Methylosome protein 50                                                 |
| 5  | 14                 | P60709                            | ACTB     | Actin, cytoplasmic 1                                                   |
| 6  | 12                 | O43707                            | ACTN4    | Alpha-actinin-4                                                        |
| 7  | 11                 | P68363                            | TUBA1B   | Tubulin alpha-1B chain                                                 |
| 8  | 11                 | P11142                            | HSPA8    | Isoform 1 of Heat shock cognate 71 kDa protein                         |
| 9  | 11                 | P23588                            | EIF4B    | eukaryotic translation initiation factor 4B                            |
| 10 | 11                 | P68133                            | ACTA1    | Actin, alpha skeletal muscle                                           |
| 11 | 11                 | P35579                            | MYH9     | Myosin-9                                                               |
| 12 | 10                 | Q71U36                            | TUBA1A   | Tubulin alpha-1A chain                                                 |
| 13 | 10                 | P02545                            | LMNA     | Isoform A of Lamin-A/C                                                 |
| 14 | 9                  | P68366                            | TUBA4A   | Tubulin alpha-4A chain                                                 |
| 15 | 9                  | P04350                            | TUBB     | Tubulin beta chain                                                     |
| 16 | 8                  | P08238                            | HSP90AB1 | Heat shock protein HSP 90-beta                                         |
| 17 | 8                  | P11021                            | HSPA5    | HSPA5 protein                                                          |
| 18 | 8                  | Q15208                            | STK38    | Serine/threonine-protein kinase 38                                     |
| 19 | 8                  | Q13813                            | SPTAN1   | Splice Isoform 1 of Spectrin alpha chain, brain                        |
| 20 | 8                  | P12814                            | ACTN1    | Alpha-actinin-1                                                        |
| 21 | 8                  | Q15149                            | PLEC1    | Isoform 1 of Plectin-1                                                 |
| 22 | 6                  | P07900                            | HSP90AA1 | heat shock protein 90kDa alpha (cytosolic), class A member 1 isoform 1 |
| 23 | 6                  | P49327                            | FASN     | Fatty acid synthase                                                    |
| 24 | 6                  | Q00839                            | HNRNPU   | Isoform Short of Heterogeneous nuclear ribonucleoprotein U             |
| 25 | 6                  | Q9NYF8                            | BCLAF1   | Isoform 1 of Bcl-2-associated transcription factor 1                   |
| 26 | 6                  | Q01082                            | SPTBN1   | Isoform Long of Spectrin beta chain, brain 1                           |
| 27 | 6                  | P10809                            | HSPD1    | 60 kDa heat shock protein, mitochondrial precursor                     |
| 28 | 5                  | P60174                            | TPI1     | Isoform 1 of Triosephosphate isomerase                                 |
| 29 | 5                  | P61978                            | HNRPK    | Isoform 1 of Heterogeneous nuclear ribonucleoprotein K                 |
| 30 | 5                  | P98175                            | RBM10    | Putative uncharacterized protein DKFZp686E2459                         |
| 31 | 5                  | P62241                            | RPS8     | 40S ribosomal protein S8                                               |
| 32 | 5                  | P11940                            | PABPC1   | Isoform 1 of Polyadenylate-binding protein 1                           |
| 33 | 5                  | O43795                            | MYO1B    | Isoform 1 of Myosin-1b                                                 |
| 34 | 5                  | P14866                            | HNRNPL   | heterogeneous nuclear ribonucleoprotein L isoform a                    |
| 35 | 5                  | P14618                            | PKM2     | Isoform M1 of Pyruvate kinase isozymes M1/M2                           |
| 36 | 5                  | P09382                            | LGALS1   | Galectin-1                                                             |
| 37 | 5                  | P09651                            | HNRNPA1  | Isoform A1-B of Heterogeneous nuclear ribonucleoprotein A1             |
| 38 | 5                  | O43390                            | HNRNPR   | Heterogeneous nuclear ribonucleoprotein R                              |
| 39 | 5                  | O75369                            | FLNB     | Isoform 1 of Filamin-B                                                 |
| 40 | 4                  | Q9BRS2                            | RIOK1    | Serine/threonine-protein kinase RI01                                   |
| 41 | 4                  | P36578                            | RPL4     | 60S ribosomal protein L4                                               |
| 42 | 4                  | P16617                            | PGK1     | Phosphoglycerate kinase 1                                              |
| 43 | 4                  | P0DMV8                            | HSPA1A   | HSPA1B Heat shock 70 kDa protein 1                                     |
| 44 | 4                  | Q07020                            | RPL18    | 60S ribosomal protein L18                                              |
| 45 | 4                  | P68104                            | EEF1A1   | Elongation factor 1-alpha 1                                            |
| 46 | 4                  | P04406                            | GAPDH    | Glyceraldehyde-3-phosphate dehydrogenase                               |
| 47 | 4                  | P38159                            | RBMX     | Heterogeneous nuclear ribonucleoprotein G                              |
| 48 | 4                  | P80723                            | BASP1    | Brain acid soluble protein 1                                           |
| 49 | 4                  | Q13310                            | PABPC4   | Isoform 1 of Polyadenylate-binding protein 4                           |
| 50 | 4                  | Q9Y6Y0                            | IVNS1ABP | Influenza virus NS1A-binding protein                                   |
| 51 | 4                  | P06733                            | ENO1     | Isoform alpha-enolase of Alpha-enolase                                 |

|     |          |             |                                                                    |
|-----|----------|-------------|--------------------------------------------------------------------|
| 52  | 4 P02786 | TFRC        | Transferrin receptor protein 1                                     |
| 53  | 4 Q53HC5 | KLHL26      | Kelch-like protein 26                                              |
| 54  | 4 060506 | SYNCRIP     | Isoform 1 of Heterogeneous nuclear ribonucleoprotein Q             |
| 55  | 4 Q14103 | HNRPD       | Isoform 1 of Heterogeneous nuclear ribonucleoprotein D0            |
| 56  | 4 Q00610 | CLTC        | Isoform 1 of Clathrin heavy chain 1                                |
| 57  | 4 Q14126 | DSG2        | Desmoglein-2 precursor                                             |
| 58  | 4 Q15393 | SF3B3       | Isoform 1 of Splicing factor 3B subunit 3                          |
| 59  | 3 P42704 | LRPPRC      | Leucine-rich PPR motif-containing protein                          |
| 60  | 3 P27274 | CD59        | CD59 glycoprotein precursor                                        |
| 61  | 3 P83731 | RPL24       | 60S ribosomal protein L24                                          |
| 62  | 3 P16403 | HIST1H1C    | Histone H1.2                                                       |
| 63  | 3 P31943 | HNRPH1      | Heterogeneous nuclear ribonucleoprotein H                          |
| 64  | 3 Q99613 | EIF3C       | Eukaryotic translation initiation factor 3 subunit 8               |
| 65  | 3 P31327 | CPS1        | Isoform 1 of Carbamoyl-phosphate synthase [ammonia]                |
| 66  | 3 P22626 | HNRNPA2B1   | Isoform B1 of Heterogeneous nuclear ribonucleoproteins A2/B1       |
| 67  | 3 P00338 | LDHA        | Isoform 1 of L-lactate dehydrogenase A chain                       |
| 68  | 3 P49368 | CCT3        | chaperonin containing TCPI, subunit 3 isoform b                    |
| 69  | 3 P27797 | CALR        | Calreticulin precursor                                             |
| 70  | 3 P19338 | NCL         | CDNA FLJ45706 fis, clone FEBRA2028457, highly similar to Nucleolin |
| 71  | 3 P17066 | HSPA6       | Heat shock 70 kDa protein 6                                        |
| 72  | 3 075688 | PPM1B       | Isoform Beta-1 of Protein phosphatase 1B                           |
| 73  | 3 Q9P2E9 | RRBP1       | Isoform 3 of Ribosome-binding protein 1                            |
| 74  | 3 P05141 | SLC25A5     | ADP/ATP translocase 2                                              |
| 75  | 3 Q99729 | HNRPAB      | Isoform 4 of Heterogeneous nuclear ribonucleoprotein A/B           |
| 76  | 3 Q15365 | PCBP1       | Poly(rC)-binding protein 1                                         |
| 77  | 2 P62873 | GNB1        | Guanine nucleotide-binding protein G(I)/G(S)/G(T) subunit beta-1   |
| 78  | 2 P04075 | ALDOA       | Fructose-bisphosphate aldolase A                                   |
| 79  | 2 P62937 | PPIA;PPIAL3 | Peptidyl-prolyl cis-trans isomerase A                              |
| 80  | 2 P04792 | HSPB1       | Heat shock protein beta-1                                          |
| 81  | 2 P62753 | RPS6        | 40S ribosomal protein S6                                           |
| 82  | 2 P84098 | RPL19       | 60S ribosomal protein L19                                          |
| 83  | 2 P62899 | RPL31       | 60S ribosomal protein L31                                          |
| 84  | 2 P11166 | SLC2A1      | Solute carrier family 2, facilitated glucose transporter member 1  |
| 85  | 2 Q09028 | RBBP4       | Histone-binding protein RBBP4                                      |
| 86  | 2 Q06830 | PRDX1       | Peroxisiredoxin-1                                                  |
| 87  | 2 P17844 | DDX5        | Probable ATP-dependent RNA helicase DDX5                           |
| 88  | 2 P43652 | ALB         | Uncharacterized protein ALB                                        |
| 89  | 2 Q15942 | ZYX         | Zyxin                                                              |
| 90  | 2 Q14157 | UBAP2L      | Isoform 2 of Ubiquitin-associated protein 2-like                   |
| 91  | 2 P14625 | HSP90B1     | Endoplasmin precursor                                              |
| 92  | 2 Q08211 | DHX9        | ATP-dependent RNA helicase A                                       |
| 93  | 2 Q9Y2H1 | STK38L      | Serine/threonine-protein kinase 38-like                            |
| 94  | 2 P50914 | RPL14       | 60S ribosomal protein L14                                          |
| 95  | 2 P38646 | HSPA9       | Stress-70 protein, mitochondrial precursor                         |
| 96  | 2 Q42484 | RPS2        | 40S ribosomal protein S2                                           |
| 97  | 2 P27824 | CANX        | Calnexin precursor                                                 |
| 98  | 2 P12277 | CKB         | Creatine kinase B-type                                             |
| 99  | 2 P52272 | HNRPM       | Isoform 1 of Heterogeneous nuclear ribonucleoprotein M             |
| 100 | 2 043143 | DHX15       | Putative pre-mRNA-splicing factor ATP-dependent RNA helicase DHX15 |
| 101 | 2 P46777 | RPL5        | 60S ribosomal protein L5                                           |
| 102 | 2 P29401 | TKT         | Transketolase                                                      |
| 103 | 2 P14384 | CPM         | Carboxypeptidase M precursor                                       |

|     |          |          |                                                                                                            |
|-----|----------|----------|------------------------------------------------------------------------------------------------------------|
| 104 | 1 015042 | SR140    | Isoform 1 of U2-associated protein SR140                                                                   |
| 105 | 1 P07195 | LDHB     | L-lactate dehydrogenase B chain                                                                            |
| 106 | 1 P62888 | RPL30    | 60S ribosomal protein L30                                                                                  |
| 107 | 1 P26373 | RPL13    | 60S ribosomal protein L13                                                                                  |
| 108 | 1 Q5W0B1 | C13orf7  | RING finger protein C13orf7                                                                                |
| 109 | 1 P43243 | MATR3    | Matrin-3                                                                                                   |
| 110 | 1 P54886 | ALDH18A1 | Isoform Long of Delta-1-pyrroline-5-carboxylate synthetase                                                 |
| 111 | 1 Q15366 | PCBP2    | poly(rC)-binding protein 2 isoform b                                                                       |
| 112 | 1 000159 | MYO1C    | Myosin-Ic                                                                                                  |
| 113 | 1 Q02878 | RPL6     | 60S ribosomal protein L6                                                                                   |
| 114 | 1 Q92804 | TAF15    | Isoform Short of TATA-binding protein-associated factor 2N                                                 |
| 115 | 1 P47914 | RPL29    | 60S ribosomal protein L29                                                                                  |
| 116 | 1 Q9P267 | MBD5     | Isoform 2 of Methyl-CpG-binding domain protein 5                                                           |
| 117 | 1 Q8NA68 | FLJ35785 | CDNA FLJ35785 fis, clone TESTI2005603, moderately similar to Homo sapiens 88-kDa Golgi protein (GM88) mRNA |
| 118 | 1 P62280 | RPS11    | 40S ribosomal protein S11                                                                                  |
| 119 | 1 P11387 | TOP1     | DNA topoisomerase 1                                                                                        |
| 120 | 1 P21291 | CSRP1    | Cysteine and glycine-rich protein 1                                                                        |
| 121 | 1 P06576 | ATP5B    | ATP synthase subunit beta, mitochondrial precursor                                                         |
| 122 | 1 P05388 | RPLP0    | 60S acidic ribosomal protein P0                                                                            |
| 123 | 1 Q14344 | GNA13    | Guanine nucleotide-binding protein alpha-13 subunit                                                        |
| 124 | 1 Q3ZCV2 | Clorf177 | Isoform 2 of Uncharacterized protein Clorf177                                                              |
| 125 | 1 P62906 | RPL10A   | 60S ribosomal protein L10a                                                                                 |
| 126 | 1 P26599 | PTBP1    | Isoform 1 of Polypyrimidine tract-binding protein 1                                                        |
| 127 | 1 P12956 | XRCC6    | ATP-dependent DNA helicase 2 subunit 1                                                                     |
| 128 | 1 P62314 | SNRPD1   | Small nuclear ribonucleoprotein Sm D1                                                                      |
| 129 | 1 P30101 | PDIA3    | Protein disulfide-isomerase A3 precursor                                                                   |
| 130 | 1 P14678 | SNRPB    | Isoform SM-B' of Small nuclear ribonucleoprotein-associated proteins B and B'                              |
| 131 | 1 Q8NC51 | SERBP1   | Isoform 1 of Plasminogen activator inhibitor 1 RNA-binding protein                                         |
| 132 | 1 P27694 | RPA1     | Replication protein A 70 kDa DNA-binding subunit                                                           |
| 133 | 1 P24534 | EEF1B2   | Elongation factor 1-beta                                                                                   |
| 134 | 1 Q9UHB6 | LIMA1    | Isoform Beta of LIM domain and actin-binding protein 1                                                     |
| 135 | 1 Q13347 | EIF3I    | Eukaryotic translation initiation factor 3 subunit 2                                                       |
| 136 | 1 075533 | SF3B1    | Splicing factor 3B subunit 1                                                                               |
| 137 | 1 Q92901 | RPL3L    | 60S ribosomal protein L3-like                                                                              |
| 138 | 1 P62266 | RPS23    | 40S ribosomal protein S23                                                                                  |
| 139 | 1 P07237 | P4HB     | Protein disulfide-isomerase precursor                                                                      |
| 140 | 1 P62913 | RPL11    | Isoform 1 of 60S ribosomal protein L11                                                                     |
| 141 | 1 P84103 | SFRS3    | Splicing factor, arginine/serine-rich 3                                                                    |
| 142 | 1 Q71UI9 | H2AFV    | Histone H2AV                                                                                               |
| 143 | 1 Q02543 | RPL18A   | ribosomal protein L18a                                                                                     |
| 144 | 1 P23396 | RPS3     | 40S ribosomal protein S3                                                                                   |
| 145 | 1 095274 | LYPD3    | Ly6/PLAUR domain-containing protein 3 precursor                                                            |
| 146 | 1 P29692 | EEF1D    | Elongation factor 1-delta                                                                                  |
| 147 | 1 Q7RTV0 | PHF5A    | PHD finger-like domain-containing protein 5A                                                               |
| 148 | 1 Q8WWY3 | PRPF31   | Isoform 2 of U4/U6 small nuclear ribonucleoprotein Prp31                                                   |
| 149 | 1 Q14444 | CAPRIN1  | Caprin-1                                                                                                   |
| 150 | 1 P14923 | JUP      | Junction plakoglobin                                                                                       |
| 151 | 1 Q14151 | SAFB2    | Scaffold attachment factor B2                                                                              |
| 152 | 1 P19838 | NFKB1    | Isoform 2 of Nuclear factor NF-kappa-B p105 subunit                                                        |
| 153 | 1 Q15717 | ELAVL1   | ELAV-like protein 1                                                                                        |
| 154 | 1 P51991 | HNRPA3   | Isoform 1 of Heterogeneous nuclear ribonucleoprotein A3                                                    |
| 155 | 1 A6NMY6 | ANXA2P2  | Uncharacterized protein ENSP00000368744                                                                    |

|     |          |           |                                                                                           |
|-----|----------|-----------|-------------------------------------------------------------------------------------------|
| 156 | 1 Q12965 | MYO1E     | Myosin-Ie                                                                                 |
| 157 | 1 060812 | HNRPCL1   | Heterogeneous nuclear ribonucleoprotein C-like 1                                          |
| 158 | 1 Q15750 | MAP3K7IP1 | Mitogen-activated protein kinase kinase kinase 7-interacting protein 1                    |
| 159 | 1 P61313 | RPL15     | 60S ribosomal protein L15                                                                 |
| 160 | 1 Q14247 | CTTN      | Src substrate cortactin                                                                   |
| 161 | 1 Q13595 | TRA2A     | Isoform Long of Transformer-2 protein homolog                                             |
| 162 | 1 Q9UK33 | ZNF580    | Zinc finger protein 580                                                                   |
| 163 | 1 Q5GH73 | XKR6      | Isoform 2 of XK-related protein 6                                                         |
| 164 | 1 P61247 | RPS3A     | 40S ribosomal protein S3a                                                                 |
| 165 | 1 P60900 | PSMA6     | Proteasome subunit alpha type-6                                                           |
| 166 | 1 P04843 | RPN1      | Dolichyl-diphosphooligosaccharide--protein glycosyltransferase 67 kDa subunit precursor   |
| 167 | 1 P16401 | HIST1H1B  | Histone H1.5                                                                              |
| 168 | 1 P08174 | CD55      | Decay-accelerating factor splicing variant 4                                              |
| 169 | 1 P00709 | LALBA     | Alpha-lactalbumin precursor                                                               |
| 170 | 1 P13010 | XRCC5     | ATP-dependent DNA helicase 2 subunit 2                                                    |
| 171 | 1 Q08AN1 | ZNF616    | Zinc finger protein 616                                                                   |
| 172 | 1 Q14766 | LTBP1     | Latent-transforming growth factor beta-binding protein, isoform 1L precursor              |
| 173 | 1 Q9H3R1 | NDST4     | Bifunctional heparan sulfate N-deacetylase/N-sulfotransferase 4                           |
| 174 | 1 P35858 | IGFALS    | Insulin-like growth factor-binding protein complex acid labile chain precursor            |
| 175 | 1 P22314 | UBE1      | Ubiquitin-activating enzyme E1                                                            |
| 176 | 1 Q14028 | CNGB1     | cyclic nucleotide gated channel beta 1                                                    |
| 177 | 1 P22234 | PAICS     | Multifunctional protein ADE2                                                              |
| 178 | 1 P53396 | ACLY      | ATP-citrate synthase                                                                      |
| 179 | 1 Q92845 | KIFAP3    | Kinesin-associated protein 3                                                              |
| 180 | 1 Q9NTJ3 | SMC4      | Isoform 2 of Structural maintenance of chromosomes protein 4                              |
| 181 | 1 P11586 | MTHFD1    | C-1-tetrahydrofolate synthase, cytoplasmic                                                |
| 182 | 1 060266 | ADCY3     | Adenylate cyclase type 3                                                                  |
| 183 | 1 P53999 | SUB1      | Activated RNA polymerase II transcriptional coactivator p15                               |
| 184 | 1 P08758 | ANXA5     | Annexin A5                                                                                |
| 185 | 1 P62249 | RPS16     | 40S ribosomal protein S16                                                                 |
| 186 | 1 P35241 | RDX       | Radixin isoform b                                                                         |
| 187 | 1 000567 | NOL5A     | Nucleolar protein 5A                                                                      |
| 188 | 1 015397 | IP08      | Importin-8                                                                                |
| 189 | 1 P35251 | RFC1      | Isoform 1 of Replication factor C subunit 1                                               |
| 190 | 1 000469 | PLOD2     | Isoform 2 of Procollagen-lysine,2-oxoglutarate 5-dioxygenase 2 precursor                  |
| 191 | 1 Q69YN2 | CWF19L1   | CWF19-like 1, cell cycle control                                                          |
| 192 | 1 Q9NW15 | TMEM16K   | Isoform 1 of Transmembrane protein 16K                                                    |
| 193 | 1 Q96BJ3 | Clorf80   | Isoform 1 of UPF0491 protein Clorf80                                                      |
| 194 | 1 Q5SRN2 | C6orf10   | Testis specific basic protein                                                             |
| 195 | 1 Q9NUN8 | FLJ11235  | Putative uncharacterized protein FLJ11235                                                 |
| 196 | 1 I7GEV6 | FLJ41327  | CDNA FLJ41327 fis, clone BRAMY2047169                                                     |
| 197 | 1 Q96B86 | RGMA      | Isoform 2 of Repulsive guidance molecule A precursor                                      |
| 198 | 1 P67809 | YBX1      | Nuclease sensitive element-binding protein 1                                              |
| 199 | 1 P62424 | RPL7A     | 60S ribosomal protein L7a                                                                 |
| 200 | 1 Q96QZ7 | MAGI1     | Isoform 2 of Membrane-associated guanylate kinase, WW and PDZ domain-containing protein 1 |
| 201 | 1 Q14008 | CKAP5     | Cytoskeleton-associated protein 5                                                         |
| 202 | 1 P35659 | DEK       | Protein DEK                                                                               |
| 203 | 1 Q9Y6G9 | DYNC1LI1  | Cytoplasmic dynein 1 light intermediate chain 1                                           |
| 204 | 1 P31689 | DNAJA1    | DnaJ homolog subfamily A member 1                                                         |
| 205 | 1 Q9Y2K9 | STXBP5L   | Isoform 1 of Syntaxin-binding protein 5-like                                              |

|     |          |          |                                                                         |
|-----|----------|----------|-------------------------------------------------------------------------|
| 206 | 1 095382 | MAP3K6   | Isoform 1 of Mitogen-activated protein kinase kinase kinase 6           |
| 207 | 1 P13640 | MT1G     | Isoform 1 of Metallothionein-1G                                         |
| 208 | 1 Q03405 | PLAUR    | Isoform 1 of Urokinase plasminogen activator surface receptor precursor |
| 209 | 1 Q13151 | HNRNPAO  | Heterogeneous nuclear ribonucleoprotein A0                              |
| 210 | 1 Q12797 | ASPH     | aspartate beta-hydroxylase isoform c                                    |
| 211 | 1 P13639 | EEF2     | Elongation factor 2                                                     |
| 212 | 1 Q5VT06 | CEP350   | Centrosome-associated protein 350                                       |
| 213 | 1 P06744 | GPI      | Glucose-6-phosphate isomerase                                           |
| 214 | 1 Q9P219 | CCDC88C  | similar to DVL-binding protein DAPLE isoform 2                          |
| 215 | 1 094979 | SEC31A   | Isoform 3 of Protein transport protein Sec31A                           |
| 216 | 1 Q12829 | RAB40B   | Ras-related protein Rab-40B                                             |
| 217 | 1 P83369 | LSM11    | U7 snRNA-associated Sm-like protein LSM11                               |
| 218 | 1 Q9GZV4 | EIF5A2   | Eukaryotic translation initiation factor 5A-2                           |
| 219 | 1 Q8WUA7 | TBC1D22A | Isoform 1 of TBC1 domain family member 22A                              |
| 220 | 1 P61160 | ACTR2    | Actin-related protein 2                                                 |
| 221 | 1 P55209 | NAP1L1   | Nucleosome assembly protein 1-like 1                                    |
| 222 | 1 Q96SI9 | STRBP    | Isoform 1 of Spermatid perinuclear RNA-binding protein                  |
| 223 | 1 075494 | SFRS10   | Splicing factor, arginine/serine-rich 10                                |
| 224 | 1 Q12872 | SFRS8    | Splicing factor, arginine/serine-rich 8                                 |
| 225 | 1 P45880 | VDAC2    | Voltage-dependent anion-selective channel protein 2                     |
| 226 | 1 P57088 | TMEM33   | Transmembrane protein 33                                                |
| 227 | 1 P51114 | FXR1     | Isoform 1 of Fragile X mental retardation syndrome-related protein 1    |
| 228 | 1 P43115 | PTGER3   | Isoform EP3E of Prostaglandin E2 receptor EP3 subtype                   |
| 229 | 1 P55884 | EIF3B    | Isoform 1 of Eukaryotic translation initiation factor 3 subunit 9       |
| 230 | 1 P30050 | RPL12    | 60S ribosomal protein L12                                               |
| 231 | 1 Q14498 | RBM39    | Isoform 1 of RNA-binding protein 39                                     |
| 232 | 1 P78527 | PRKDC    | Isoform 1 of DNA-dependent protein kinase catalytic subunit             |
| 233 | 1 Q63HR2 | TENC1    | Isoform 2 of Tensin-like C1 domain-containing phosphatase               |
| 234 | 1 075159 | SOCS5    | Suppressor of cytokine signaling 5                                      |
| 235 | 1 P35232 | PHB      | Prohibitin                                                              |
| 236 | 1 Q08945 | SSRP1    | FACT complex subunit SSRP1                                              |
| 237 | 1 P23246 | SFPQ     | Isoform Long of Splicing factor, proline- and glutamine-rich            |
| 238 | 1 Q96JQ0 | DCHS1    | Protocadherin-16 precursor                                              |
| 239 | 1 P31153 | MAT2A    | S-adenosylmethionine synthetase isoform type-2                          |
| 240 | 1 P34932 | HSPA4    | Heat shock 70 kDa protein 4                                             |
| 241 | 1 094813 | SLIT2    | Slit homolog 3 protein precursor                                        |
| 242 | 1 Q9NR30 | DDX21    | Isoform 1 of Nucleolar RNA helicase 2                                   |
| 243 | 1 P13674 | P4HA1    | Isoform 1 of Prolyl 4-hydroxylase subunit alpha-1 precursor             |
| 244 | 1 P21589 | NT5E     | 5'-nucleotidase precursor                                               |
| 245 | 1 P46087 | NOL1     | 94 kDa protein                                                          |
| 246 | 1 095831 | AIFM1    | Isoform 1 of Apoptosis-inducing factor 1, mitochondrial precursor       |
| 247 | 1 Q96SB3 | PPP1R9B  | Conserved hypothetical protein                                          |
| 248 | 1 P18124 | RPL7     | 60S ribosomal protein L7                                                |
| 249 | 1 Q13242 | SFRS9    | Splicing factor, arginine/serine-rich 9                                 |
| 250 | 1 Q9HAU5 | UPF2     | CDNA FLJ23795 fis, clone HEP22107                                       |
| 251 | 1 P17096 | HMGA1    | Isoform HMG-I of High mobility group protein HMG-I/HMG-Y                |
| 252 | 1 014598 | VCY      | VCY1B Testis-specific basic protein Y 1                                 |
| 253 | 1 P08670 | VIM      | Vimentin                                                                |
| 254 | 1 P14550 | AKR1A1   | Alcohol dehydrogenase                                                   |
| 255 | 1 Q9P2J3 | KLHL9    | Kelch-like protein 9                                                    |
| 256 | 1 Q14764 | MVP      | Major vault protein                                                     |
| 257 | 1 P31948 | STIP1    | Stress-induced-phosphoprotein 1                                         |

|     |          |        |                                                                                |
|-----|----------|--------|--------------------------------------------------------------------------------|
| 258 | 1 Q6UWQ7 | IGFL2  | LOC401923 CDNA FLJ43766 fis, clone TESTI2049246                                |
| 259 | 1 Q60832 | DKC1   | H/ACA ribonucleoprotein complex subunit 4                                      |
| 260 | 1 P02100 | HBE1   | Hemoglobin subunit epsilon                                                     |
| 261 | 1 Q9UM47 | NOTCH3 | Neurogenic locus notch homolog protein 3 precursor                             |
| 262 | 1 Q92608 | DOCK2  | Isoform 1 of Dedicator of cytokinesis protein 2                                |
| 263 | 1 Q14781 | CBX2   | Isoform 1 of Chromobox protein homolog 2                                       |
| 264 | 1 P24752 | ACAT1  | Acetyl-CoA acetyltransferase, mitochondrial precursor                          |
| 265 | 1 P05023 | ATP1A1 | Isoform Long of Sodium/potassium-transporting ATPase subunit alpha-1 precursor |
| 266 | 1 Q5DX21 | IGSF11 | CDNA FLJ40348 fis, clone TESTI2033300                                          |
| 267 | 1 P62854 | RPS26  | 40S ribosomal protein S26                                                      |
| 268 | 1 Q01081 | U2AF1  | Splicing factor U2AF 35 kDa subunit                                            |
| 269 | 1 Q15427 | SF3B4  | Splicing factor 3B subunit 4                                                   |
| 270 | 1 Q96HS1 | PGAM5  | Isoform 2 of Phosphoglycerate mutase family member 5 precursor                 |
| 271 | 1 P0C1Z6 | TFPT   | 22 kDa protein                                                                 |
| 272 | 1 Q9H252 | KCNH6  | Isoform 1 of Potassium voltage-gated channel subfamily H member 6              |
| 273 | 1 P22105 | TNXB   | Isoform XB of Tenascin-X precursor                                             |
| 274 | 1 Q96I13 | ABHD8  | Abhydrolase domain-containing protein 8                                        |
| 275 | 1 Q01851 | POU4F1 | POU domain, class 4, transcription factor 1                                    |
| 276 | 1 P35052 | GPC1   | Glypican-1 precursor                                                           |
| 277 | 1 Q9HCE3 | ZNF532 | Zinc finger protein 532                                                        |
| 278 | 1 P26640 | VAR5   | Valyl-tRNA synthetase                                                          |
| 279 | 1 Q94875 | SORBS2 | 55 kDa protein                                                                 |
| 280 | 1 Q6WCQ1 | M-RIP  | myosin phosphatase-Rho interacting protein isoform 1                           |
| 281 | 1 P31942 | HNRPH3 | Isoform 1 of Heterogeneous nuclear ribonucleoprotein H3                        |
| 282 | 1 P57789 | KCNK10 | Isoform A of Potassium channel subfamily K member 10                           |
| 283 | 1 P25705 | ATP5A1 | ATP synthase subunit alpha, mitochondrial precursor                            |
| 284 | 1 Q9UQ35 | SRRM2  | Isoform 1 of Serine/arginine repetitive matrix protein 2                       |
| 285 | 1 P50402 | EMD    | Emerin                                                                         |
| 286 | 1 Q8TDJ6 | DMXL2  | DmX-like protein 2                                                             |
| 287 | 1 P09874 | PARP1  | Poly [ADP-ribose] polymerase 1                                                 |
| 288 | 1 P46778 | RPL21  | 60S ribosomal protein L21                                                      |
| 289 | 1 P49792 | RANBP2 | E3 SUMO-protein ligase RanBP2                                                  |
| 290 | 1 P55265 | ADAR   | Isoform 2 of Double-stranded RNA-specific adenosine deaminase                  |
